# Supplementary material for: Single Crystals of EuScCuSe3: Synthesis, Experimental and DFT Investigations
Source: MDPI journal article supplement (doi:10.3390/ma16041555), 2023-02-13
Supplement: s1 [file s1]

# Single Crystals of EuScCuSe<sub>3</sub>: Synthesis, Experimental and DFT Investigations

Maxim V. Grigoriev <sup>1,2,\*</sup>, Anna V. Ruseikina <sup>1</sup>, Vladimir A. Chernyshev <sup>3</sup>, Aleksandr S. Oreshonkov <sup>4,5,\*</sup>, Alexander A. Garmonov <sup>6</sup>, Maxim S. Molokeev <sup>7,8,9</sup>, Ralf J. C. Locke <sup>2</sup>, Andrey V. Elyshev <sup>1</sup> and Thomas Schleid <sup>2,\*</sup>

<sup>1</sup> Laboratory of Theory and Optimization of Chemical and Technological Processes, University of Tyumen, 625003 Tyumen, Russia

<sup>2</sup> Institute of Inorganic Chemistry, University of Stuttgart, D-70569 Stuttgart, Germany

<sup>3</sup> Institute of Natural Sciences and Mathematics, Ural Federal University named after the First President of Russia B.N. Yeltsin, Mira Str. 19, 620002 Ekaterinburg, Russia

<sup>4</sup> Laboratory of Molecular Spectroscopy, Kirensky Institute of Physics, Federal Research Center KSC SB RAS, Krasnoyarsk 660036, Russia

<sup>5</sup> School of Engineering and Construction, Siberian Federal University, Krasnoyarsk 660041, Russia

<sup>6</sup> Institute of Physics and Technology, University of Tyumen, Tyumen 625003, Russia

<sup>7</sup> Institute of Engineering Physics and Radioelectronics of Siberian State University, 660041 Krasnoyarsk, Russia

<sup>8</sup> Laboratory of Crystal Physics, Kirensky Institute of Physics, Federal Research Center KSC SB RAS, Krasnoyarsk 660036, Russia

<sup>9</sup> Department of Physics, Far Eastern State Transport University, Khabarovsk 680021, Russia

\* Correspondence: ma.v.grigoriev@utmn.ru (M.V.G.); oreshonkov@iph.krasn.ru (A.S.O.); schleid@iac.uni-stuttgart.de (T.S.)

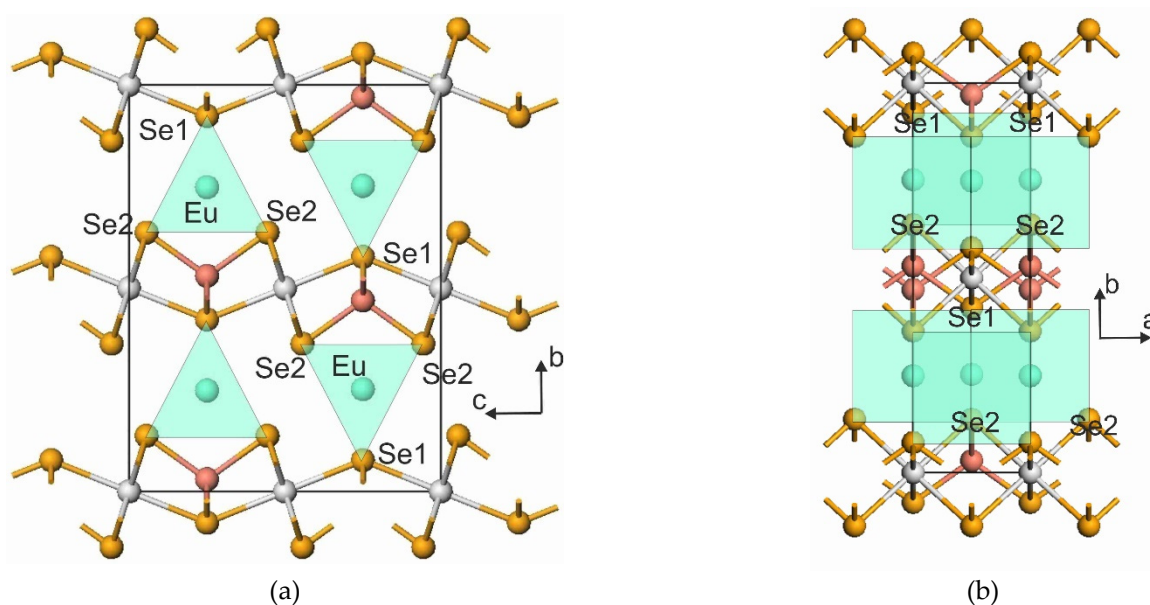

**Figure S1.** Crystal structure of EuScCuSe<sub>3</sub>. Projection onto the *bc* plane (a) and onto the *ab* plane (b). The trigonal prisms [EuSe<sub>6</sub>]<sup>10-</sup> are colored in turquoise.

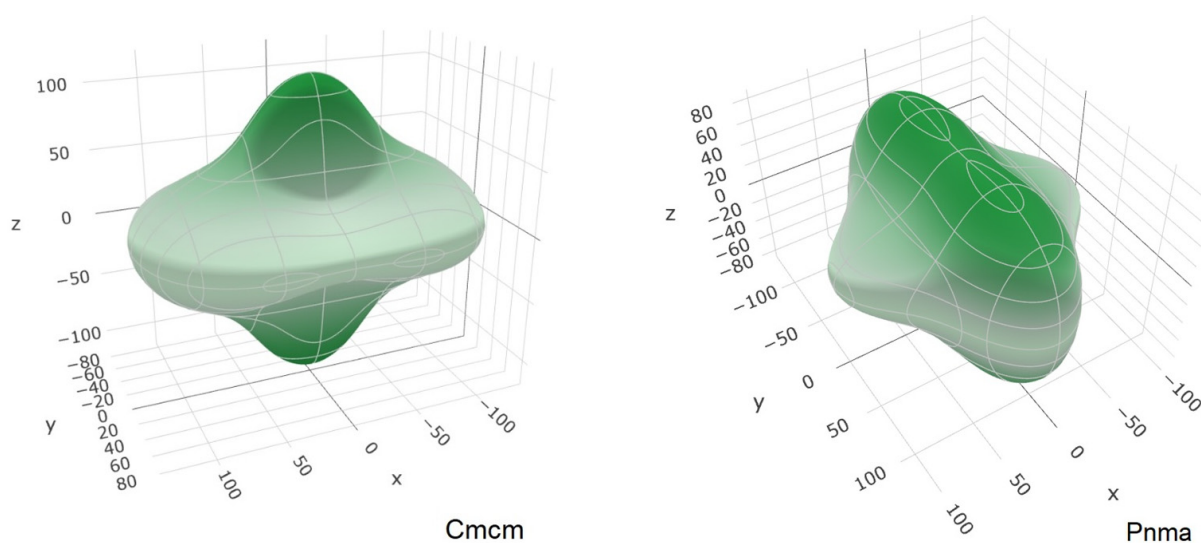

**Figure S2.** Dependence of the *Young's* modulus in GPa on the crystallographic directions in EuScCuSe<sub>3</sub> for both possible orthorhombic structures.

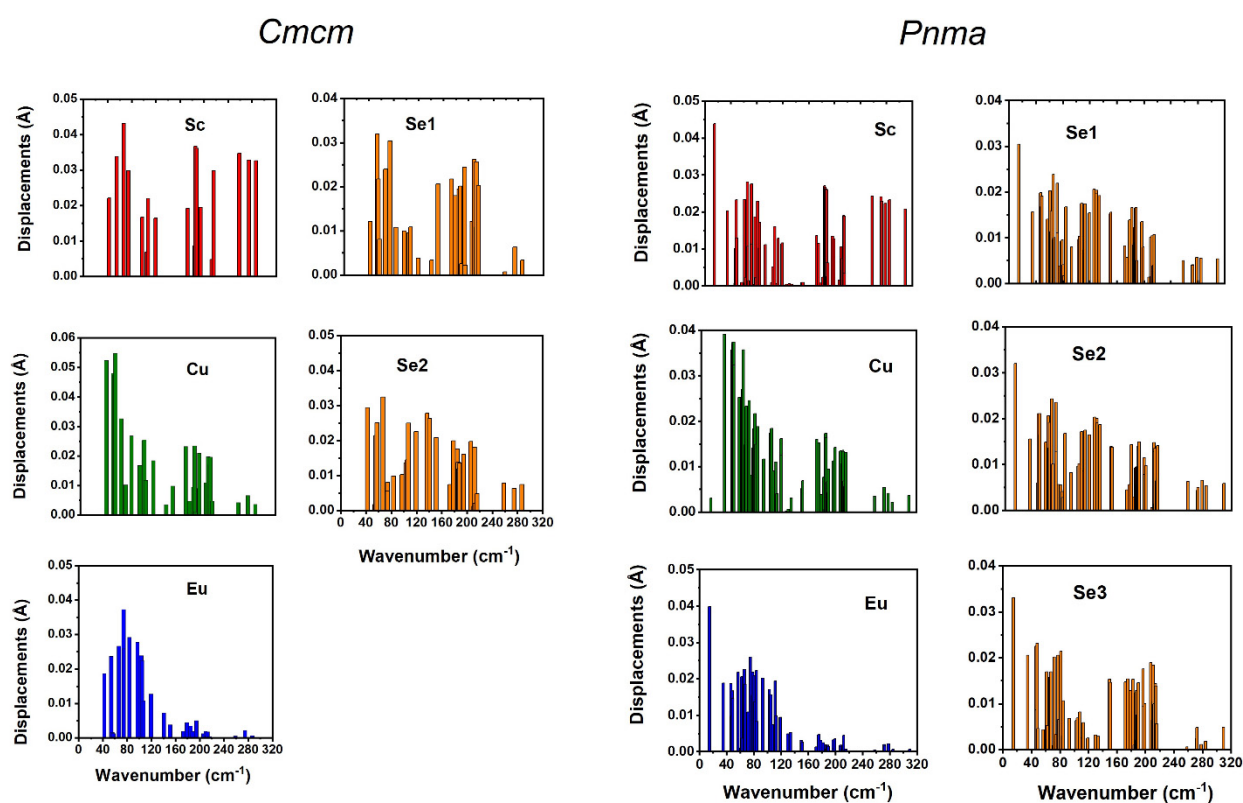

**Figure S3.** Displacement of ions at the phonon modes in the crystal structure of EuScCuSe<sub>3</sub> in both possible descriptions (*Cmc* and *Pnma*).

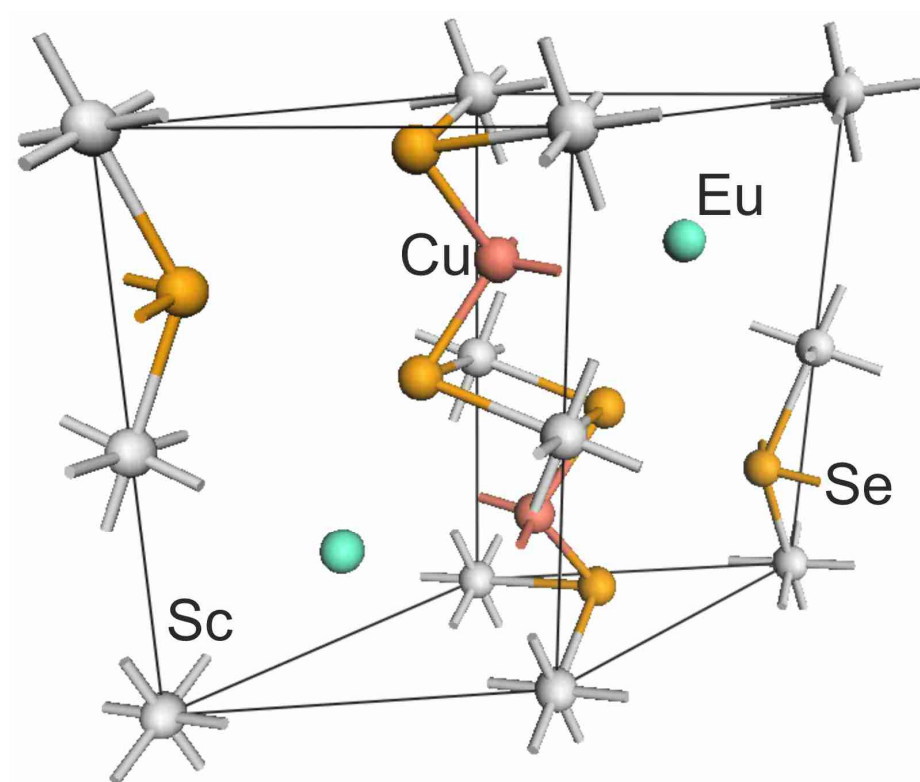

**Figure S4.** Primitive cell of  $\text{EuScCuSe}_3$ .

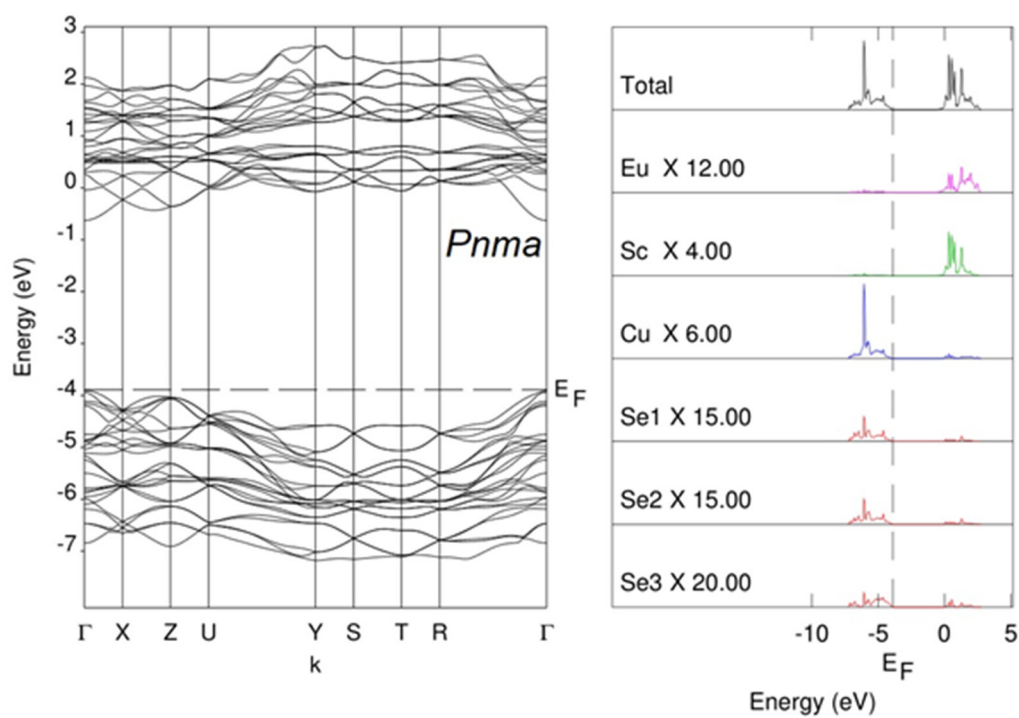

**Figure S5.** Band structure and electronic density of states of  $\text{EuScCuSe}_3$  calculated for the dynamically unstable  $Pnma$  structure.

**Table S1.** Anisotropic displacement parameters in Å<sup>2</sup> of EuScCuSe<sub>3</sub>.

| Atom | $U_{11}$   | $U_{22}$   | $U_{33}$   | $U_{12}$ | $U_{13}$ | $U_{23}$    |
|------|------------|------------|------------|----------|----------|-------------|
| Eu   | 0.0164(6)  | 0.0213(7)  | 0.0320(8)  | 0        | 0        | 0           |
| Sc   | 0.0137(16) | 0.0143(15) | 0.0159(17) | 0        | 0        | −0.0002(13) |
| Cu   | 0.0230(15) | 0.0255(16) | 0.0241(16) | 0        | 0        | 0           |
| Se1  | 0.0152(11) | 0.0203(11) | 0.0219(12) | 0        | 0        | 0           |
| Se2  | 0.0185(8)  | 0.0190(9)  | 0.0222(10) | 0        | 0        | −0.0016(6)  |

**Table S2.** Main bond lengths in Å of EuScCuSe<sub>3</sub>.

|                      |              |                     |              |                      |            |
|----------------------|--------------|---------------------|--------------|----------------------|------------|
| Eu—Se1 <sup>ii</sup> | 2×3.0605(19) | Sc—Se1 <sup>i</sup> | 2×2.7401(8)  | Cu—Se1 <sup>ii</sup> | 2×2.449(2) |
| Eu—Se2 <sup>ii</sup> | 4×3.1711(14) | Sc—Se2 <sup>i</sup> | 4×2.7579(10) | Cu—Se2               | 2×2.428(2) |
| <Eu—Se>              | 3.1342       | <Sc—Se>             | 2.7520       | <Cu—Se>              | 2.4385     |

Symmetry codes EuScCuSe<sub>3</sub>: (i) −0.5+x, −0.5+y, z; (ii) −0.5+x, 0.5+y, z; (iii) 0.5+x, −0.5+y, z; (iv) −0.5+x, 0.5−y, −z; (v) −x, −y, −0.5+z; (vi) 0.5+x, 0.5+y, z; (vii) −0.5−x, 0.5+y, 0.5−z; (viii) 0.5−x, 0.5+y, 0.5−z; (ix) −x, y, 0.5−z.

**Table S3.** Geometric parameters for EuScCuSe<sub>3</sub>.

| Atoms 1,2,3                             | Angle 1,2,3 /° | Atoms 1,2,3                             | Angle 1,2,3 /° |
|-----------------------------------------|----------------|-----------------------------------------|----------------|
| Se2 <sup>iii</sup> —Sc—Se2 <sup>i</sup> | 92.62(4)       | Se1—Eu—Se2 <sup>ix</sup>                | 86.80(3)       |
| Se2 <sup>iv</sup> —Sc—Se2 <sup>i</sup>  | 87.38(4)       | Se1—Eu—Se2                              | 139.79(3)      |
| Se1 <sup>v</sup> —Sc—Se2 <sup>iv</sup>  | 93.05(5)       | Se1—Eu—Se1                              | 81.32(6)       |
| Se1 <sup>v</sup> —Sc—Se2 <sup>iii</sup> | 86.95(5)       | Se2—Cu—Se2 <sup>ix</sup>                | 108.68(12)     |
| Se2 <sup>ix</sup> —Eu—Se2               | 76.92(5)       | Se1 <sup>ii</sup> —Cu—Se2               | 109.79(3)      |
| Se2 <sup>ix</sup> —Eu—Se2 <sup>ix</sup> | 77.93(4)       | Se1 <sup>ii</sup> —Cu—Se1 <sup>vi</sup> | 109.01(14)     |
| Se2 <sup>ix</sup> —Eu—Se2               | 124.38(6)      |                                         |                |

**Table S4.** Wavenumbers in cm<sup>−1</sup> and types of the phonon modes at the  $\Gamma$ -point for EuScCuSe<sub>3</sub> in the *Cmcm* structure. The intensity of the Raman modes was calculated for  $\lambda$  = 532 nm and  $T$  = 298 K.

| wavenumber, cm <sup>−1</sup> | type | IR                  |                 | Raman               |                              | participating ions                                                           |
|------------------------------|------|---------------------|-----------------|---------------------|------------------------------|------------------------------------------------------------------------------|
|                              |      | active/<br>inactive | intensity, a.u. | active/<br>inactive | intensity,<br>relative units |                                                                              |
| 42.3B <sub>1u</sub>          | A    |                     | 35.28I          |                     |                              | Eu, Sc <sup>S</sup> , Cu <sup>S</sup> , Se1, Se2 <sup>S</sup>                |
| 53.7B <sub>1g</sub>          | I    |                     | 0A              |                     | 1000                         | Eu <sup>S</sup> , Cu <sup>S</sup> , Se1 <sup>S</sup> ,                       |
| 55.4B <sub>2u</sub>          | A    |                     | 18.31I          |                     |                              | Sc <sup>S</sup> , Cu <sup>S</sup> , Se1 <sup>S</sup> , Se2 <sup>S</sup>      |
| 57.3B <sub>2g</sub>          | I    |                     | 0A              |                     | 87.60                        | Cu <sup>S</sup> , Se1 <sup>W</sup> , Se2 <sup>S</sup>                        |
| 66.7A <sub>g</sub>           | I    |                     | 0A              |                     | 169.13                       | Eu <sup>S</sup> , Cu <sup>S</sup> , Se1 <sup>S</sup> , Se2                   |
| 66.9A <sub>u</sub>           | I    |                     | 0I              |                     |                              | Sc <sup>S</sup> , Se2 <sup>S</sup>                                           |
| 74.0B <sub>2g</sub>          | I    |                     | 0A              |                     | 31.80                        | Eu <sup>S</sup> , Cu <sup>W</sup> , Se2 <sup>W</sup>                         |
| 74.3B <sub>1u</sub>          | A    |                     | 34.48I          |                     |                              | Eu <sup>S</sup> , Sc <sup>S</sup> , Cu, Se1 <sup>S</sup> , Se2 <sup>W</sup>  |
| 83.8B <sub>1g</sub>          | I    |                     | 0A              |                     | 83.90                        | Eu <sup>S</sup> , Cu <sup>S</sup> , Se1, Se2 <sup>W</sup>                    |
| 97.2B <sub>2u</sub>          | A    |                     | 44.2I           |                     |                              | Eu <sup>S</sup> , Sc, Cu, Se1, Se2                                           |
| 103.3A <sub>g</sub>          | I    |                     | 0A              |                     | 122.47                       | Eu <sup>S</sup> , Cu <sup>S</sup> , Se1 <sup>W</sup> , Se2                   |
| 104.6B <sub>3u</sub>         | A    |                     | 190.65I         |                     |                              | Eu <sup>S</sup> , Sc <sup>W</sup> , Cu <sup>S</sup> , Se1 <sup>W</sup> , Se2 |
| 107.1B <sub>1u</sub>         | A    |                     | 87.97I          |                     |                              | Eu, Sc <sup>S</sup> , Cu, Se1, Se2 <sup>S</sup>                              |
| 119.5B <sub>3u</sub>         | A    |                     | 109.68I         |                     |                              | Eu, Sc, Cu, Se2 <sup>S</sup>                                                 |
| 136.8B <sub>3g</sub>         | I    |                     | 0A              |                     | 37.97                        | Se2 <sup>S</sup>                                                             |
| 140.7B <sub>1g</sub>         | I    |                     | 0A              |                     | 2.21                         | Eu <sup>W</sup> , Se2 <sup>S</sup>                                           |
| 151.0B <sub>2g</sub>         | I    |                     | 0A              |                     | 1.78                         | Cu <sup>W</sup> , Se1 <sup>S</sup> , Se2 <sup>S</sup>                        |

|                      |   |          |        |                                                                         |
|----------------------|---|----------|--------|-------------------------------------------------------------------------|
| 172.7B <sub>3u</sub> | A | 12.99l   |        | Sc, Cu <sup>S</sup> , Se1 <sup>S</sup> , Se2 <sup>W</sup>               |
| 178.8A <sub>g</sub>  | I | 0A       | 116.72 | Se1, Se2                                                                |
| 184.9B <sub>3u</sub> | A | 1.44l    |        | Sc <sup>W</sup> , Cu <sup>W</sup> , Se1, Se2                            |
| 185.7A <sub>u</sub>  | I | 0l       |        | Sc <sup>S</sup> , Se2                                                   |
| 187.1A <sub>g</sub>  | I | 0A       | 28.63  | Cu <sup>S</sup> , Se1 <sup>S</sup> , Se2                                |
| 188.3B <sub>2u</sub> | A | 1143.54l |        | Sc <sup>S</sup> , Se2                                                   |
| 194.3B <sub>2g</sub> | I | 0A       | 37.61  | Eu <sup>W</sup> , Cu <sup>W</sup> , Se1 <sup>S</sup> , Se2              |
| 194.8B <sub>1u</sub> | A | 474.57l  |        | Sc, Cu <sup>S</sup> , Se2                                               |
| 205.9A <sub>g</sub>  | I | 0A       | 215.74 | Cu, Se1, Se2                                                            |
| 209.5B <sub>1g</sub> | I | 0A       | 9.34   | Cu, Se1 <sup>S</sup>                                                    |
| 212.1B <sub>2g</sub> | I | 0A       | 18.56  | Cu, Se1, Se2                                                            |
| 212.8B <sub>2u</sub> | A | 129.89l  |        | Cu, Se1 <sup>S</sup>                                                    |
| 216.2B <sub>1u</sub> | A | 601.66l  |        | Sc <sup>S</sup> , Se1 <sup>S</sup>                                      |
| 258.7B <sub>1u</sub> | A | 67.47l   |        | Sc <sup>S</sup> , Se2 <sup>W</sup>                                      |
| 274.6B <sub>3u</sub> | A | 390.67l  |        | Sc <sup>S</sup> , Cu <sup>W</sup> , Se1 <sup>W</sup> , Se2 <sup>W</sup> |
| 286.7B <sub>3u</sub> | A | 36.18l   |        | Sc <sup>S</sup> , Se2 <sup>W</sup>                                      |

Note: Superscripts "S" and "W" in the last column denote strong and weak ion displacements in this mode, respectively. If the displacement is more or equal 0.02 Å, it is denoted as "S"; if the displacement is 0.005–0.01 Å, it is denoted as "W"; if the displacement is <0.005 Å, the ion is omitted from consideration.

**Table S5.** Wavenumbers in cm<sup>−1</sup> and types of the phonon modes at the  $\Gamma$ -point for EuScCuSe<sub>3</sub> in the *Pnma* structure. The intensity of the Raman modes was calculated for  $\lambda = 532$  nm and  $T = 298$  K.

| wavenumber,<br>cm <sup>−1</sup> | type | IR                  |                    | Raman               |                              | participating ions                                                                         |
|---------------------------------|------|---------------------|--------------------|---------------------|------------------------------|--------------------------------------------------------------------------------------------|
|                                 |      | active/<br>inactive | intensity,<br>a.u. | active/<br>inactive | intensity,<br>relative units |                                                                                            |
| 14.7A <sub>g</sub>              | I    |                     | 0A                 |                     | 25.23                        | Eu <sup>S</sup> , Sc <sup>S</sup> , Se1 <sup>S</sup> , Se2 <sup>S</sup> , Se3 <sup>S</sup> |
| 34.9B <sub>1g</sub>             | I    |                     | 0A                 |                     | 0.06                         | Eu, Sc <sup>S</sup> , Cu <sup>S</sup> , Se1, Se2, Se3 <sup>S</sup>                         |
| 46.5A <sub>u</sub>              | I    |                     | 0l                 |                     |                              | Eu, Cu <sup>S</sup> , Se1 <sup>W</sup> , Se2 <sup>W</sup> , Se3 <sup>S</sup>               |
| 47.0A <sub>g</sub>              | I    |                     | 0A                 |                     | 7.28                         | Eu <sup>W</sup> , Sc, Cu <sup>S</sup> , Se1, Se2 <sup>S</sup> , Se3 <sup>W</sup>           |
| 48.3B <sub>2u</sub>             | A    |                     | 17.08l             |                     |                              | Sc <sup>S</sup> , Cu <sup>S</sup> , Se1, Se2, Se3                                          |
| 48.6B <sub>3g</sub>             | I    |                     | 0A                 |                     | 1000                         | Eu, Cu <sup>S</sup> , Se3 <sup>S</sup>                                                     |
| 48.9B <sub>3u</sub>             | A    |                     | 88.54l             |                     |                              | Eu, Sc, Cu <sup>S</sup> , Se1, Se2 <sup>S</sup>                                            |
| 57.0B <sub>1u</sub>             | A    |                     | 0.15l              |                     |                              | Eu <sup>S</sup> , Cu <sup>S</sup> , Se1, Se2                                               |
| 61.1B <sub>1g</sub>             | I    |                     | 0A                 |                     | 0.68                         | Sc <sup>S</sup> , Cu, Se1 <sup>S</sup> , Se2 <sup>S</sup> , Se3                            |
| 61.7B <sub>1u</sub>             | A    |                     | 0.62l              |                     |                              | Eu <sup>S</sup> , Cu <sup>S</sup> , Se1, Se2                                               |
| 62.8B <sub>2g</sub>             | I    |                     | 0A                 |                     | 73.15                        | Cu <sup>S</sup> , Se1, Se2, Se3 <sup>W</sup>                                               |
| 65.7A <sub>u</sub>              | I    |                     | 0l                 |                     |                              | Sc <sup>S</sup> , Se1 <sup>S</sup> , Se2 <sup>S</sup>                                      |
| 66.1B <sub>2g</sub>             | I    |                     | 0A                 |                     | 0.79                         | Eu <sup>S</sup> , Sc, Cu, Se1 <sup>W</sup> , Se2 <sup>W</sup> , Se3                        |
| 66.9A <sub>g</sub>              | I    |                     | 0A                 |                     | 133.36                       | Eu, Cu <sup>S</sup> , Se1 <sup>W</sup> , Se2, Se3                                          |
| 71.7B <sub>3g</sub>             | I    |                     | 0A                 |                     | 7.99                         | Sc <sup>S</sup> , Se1 <sup>S</sup> , Se2 <sup>S</sup>                                      |
| 71.9B <sub>3u</sub>             | A    |                     | 8.53l              |                     |                              | Eu, Sc, Cu <sup>S</sup> , Se1, Se2, Se3 <sup>S</sup>                                       |
| 75.2B <sub>2g</sub>             | I    |                     | 0A                 |                     | 17.23                        | Eu <sup>S</sup> , Cu <sup>W</sup> , Se2 <sup>W</sup>                                       |
| 77.6B <sub>3u</sub>             | A    |                     | 39.59l             |                     |                              | Eu, Sc, Cu, Se1 <sup>W</sup> , Se2 <sup>W</sup> , Se3 <sup>S</sup>                         |
| 78.7B <sub>3g</sub>             | I    |                     | 0A                 |                     | 57.51                        | Eu <sup>S</sup> , Cu, Se1 <sup>W</sup> , Se2 <sup>W</sup> , Se3 <sup>W</sup>               |
| 80.3A <sub>u</sub>              | I    |                     | 0l                 |                     |                              | Eu <sup>S</sup> , Cu <sup>S</sup> , Se3 <sup>W</sup>                                       |
| 81.4A <sub>g</sub>              | I    |                     | 0A                 |                     | 2.8                          | Eu, Sc <sup>S</sup> , Cu, Se3 <sup>S</sup>                                                 |
| 84.0B <sub>1g</sub>             | I    |                     | 0A                 |                     | 1.02                         | Eu <sup>S</sup> , Sc, Cu, Se1 <sup>W</sup> ,                                               |
| 84.4B <sub>2g</sub>             | I    |                     | 0A                 |                     | 0.41                         | Eu <sup>W</sup> , Sc, Cu, Se1, Se2, Se3                                                    |
| 93.2B <sub>2u</sub>             | A    |                     | 119.44l            |                     |                              | Eu <sup>S</sup> , Sc, Cu, Se1 <sup>W</sup> , Se2 <sup>W</sup> , Se3 <sup>W</sup>           |
| 103.2A <sub>g</sub>             | I    |                     | 0A                 |                     | 94.69                        | Eu, Cu, Se1 <sup>W</sup> , Se2 <sup>W</sup> , Se3 <sup>W</sup>                             |

|                      |   |          |        |                                                                    |
|----------------------|---|----------|--------|--------------------------------------------------------------------|
| 104.9B <sub>1u</sub> | A | 370.45I  |        | Eu, Sc <sup>W</sup> , Cu, Se1, Se2, Se3 <sup>W</sup>               |
| 107.6B <sub>3u</sub> | A | 191.32I  |        | Eu <sup>W</sup> , Sc, Cu <sup>W</sup> , Se1, Se2, Se3 <sup>W</sup> |
| 111.4B <sub>3u</sub> | A | 0.05I    |        | Eu, Cu, Se1 <sup>W</sup> , Se2 <sup>W</sup>                        |
| 112.7A <sub>g</sub>  | I | 0A       | 1.01   | Eu <sup>W</sup> , Sc, Se1, Se2, Se3 <sup>W</sup>                   |
| 119.1B <sub>2g</sub> | I | 0A       | 0.45   | Eu <sup>W</sup> , Sc, Cu, Se1, Se2                                 |
| 119.3B <sub>1u</sub> | A | 229.2I   |        | Eu <sup>W</sup> , Sc, Cu, Se1, Se2                                 |
| 126.1B <sub>2u</sub> | A | 0.65I    |        | Se1 <sup>S</sup> , Se2 <sup>S</sup>                                |
| 129.9B <sub>1g</sub> | I | 0A       | 33.52  | Se1 <sup>S</sup> , Se2 <sup>S</sup>                                |
| 130.0A <sub>u</sub>  | I | 0I       |        | Se1, Se2                                                           |
| 134.1B <sub>3g</sub> | I | 0A       | 1.16   | Eu <sup>W</sup> , Se1, Se2                                         |
| 149.9B <sub>1u</sub> | A | 0.16I    |        | Cu <sup>W</sup> , Se1, Se2, Se3                                    |
| 151.2B <sub>2g</sub> | I | 0A       | 1.66   | Cu <sup>W</sup> , Se1, Se2, Se3                                    |
| 172.0B <sub>1u</sub> | A | 22.03I   |        | Sc, Cu, Se1 <sup>W</sup> , Se3                                     |
| 175.4B <sub>2g</sub> | I | 0A       | 0.89   | Sc, Cu, Se1 <sup>W</sup> , Se2 <sup>W</sup> , Se3                  |
| 178.8A <sub>g</sub>  | I | 0A       | 94.17  | Se1, Se2, Se3                                                      |
| 182.2B <sub>1u</sub> | A | 4.02I    |        | Cu <sup>W</sup> , Se1, Se3                                         |
| 184.6A <sub>u</sub>  | I | 0I       |        | Sc <sup>S</sup> , Se1 <sup>W</sup> , Se2 <sup>W</sup>              |
| 185.7B <sub>3g</sub> | I | 0A       | 0.25   | Sc <sup>S</sup> , Se1 <sup>W</sup> , Se2 <sup>W</sup>              |
| 185.7B <sub>3u</sub> | A | 261.78I  |        | Sc <sup>W</sup> , Cu, Se1, Se3                                     |
| 186.3A <sub>g</sub>  | I | 0A       | 19.72  | Sc <sup>W</sup> , Cu, Se1, Se2 <sup>W</sup> , Se3                  |
| 187.1B <sub>2u</sub> | A | 2231.26I |        | Sc <sup>S</sup> , Se1 <sup>W</sup> , Se2 <sup>W</sup>              |
| 187.8B <sub>1g</sub> | I | 0A       | 0.1    | Sc <sup>S</sup> , Se1 <sup>W</sup> , Se2 <sup>W</sup>              |
| 187.8B <sub>2g</sub> | I | 0A       | 4.39   | Sc <sup>W</sup> , Cu <sup>W</sup> , Se1, Se2 <sup>W</sup> , Se3    |
| 188.7B <sub>3u</sub> | A | 32.53I   |        | Se1, Se2, Se3 <sup>W</sup>                                         |
| 189.7B <sub>1u</sub> | A | 0.32I    |        | Sc <sup>W</sup> , Cu <sup>W</sup> , Se1 <sup>W</sup> , Se2, Se3    |
| 196.7B <sub>2g</sub> | I | 0A       | 17.99  | Cu <sup>W</sup> , Se1 <sup>W</sup> , Se2, Se3                      |
| 196.9A <sub>g</sub>  | I | 0A       | 50.86  | Sc, Cu, Se1, Se2 <sup>W</sup> , Se3 <sup>W</sup>                   |
| 199.2B <sub>3u</sub> | A | 776.9I   |        | Sc, Cu, Se1 <sup>W</sup> , Se2 <sup>W</sup> , Se3 <sup>W</sup>     |
| 207.6A <sub>u</sub>  | I | 0I       |        | Cu, Se3                                                            |
| 207.6B <sub>3g</sub> | I | 0A       | 5.99   | Cu, Se3                                                            |
| 210.2A <sub>g</sub>  | I | 0A       | 106.79 | Sc, Cu, Se1 <sup>W</sup> , Se2, Se3 <sup>W</sup>                   |
| 210.5B <sub>1u</sub> | A | 0.36I    |        | Cu, Se1, Se2, Se3                                                  |
| 211.0B <sub>2u</sub> | A | 299.08I  |        | Cu, Se3                                                            |
| 211.2B <sub>1g</sub> | I | 0A       | 0.57   | Cu, Se3                                                            |
| 212.1B <sub>3u</sub> | A | 235.06I  |        | Sc <sup>W</sup> , Cu <sup>W</sup> , Se1, Se2, Se3 <sup>W</sup>     |
| 214.0B <sub>3u</sub> | A | 837.3I   |        | Sc, Cu <sup>W</sup> , Se2 <sup>W</sup> , Se3                       |
| 215.0A <sub>g</sub>  | I | 0A       | 20.41  | Sc, Cu <sup>W</sup> , Se2 <sup>W</sup> , Se3                       |
| 215.4B <sub>2g</sub> | I | 0A       | 17.73  | Cu, Se1, Se2, Se3 <sup>W</sup>                                     |
| 258.2B <sub>3u</sub> | A | 129.34I  |        | Sc <sup>S</sup> , Se2 <sup>W</sup> ,                               |
| 272.1B <sub>2g</sub> | I | 0A       | 0.62   | Sc <sup>S</sup>                                                    |
| 272.6B <sub>1u</sub> | A | 714.67I  |        | Sc <sup>S</sup> , Cu <sup>W</sup> , Se2 <sup>W</sup>               |
| 278.5A <sub>g</sub>  | I | 0A       | 2.9    | Sc <sup>S</sup> , Se1 <sup>W</sup> , Se2 <sup>W</sup>              |
| 284.5B <sub>1u</sub> | A | 140.62I  |        | Sc <sup>S</sup> , Se1 <sup>W</sup> , Se2 <sup>W</sup>              |
| 309.3B <sub>2g</sub> | I | 0A       | 0.05   | Sc <sup>S</sup> , Se1 <sup>W</sup> , Se2 <sup>W</sup>              |

Note: Superscripts "S" and "W" in the last column denote strong and weak ion displacements in this mode, respectively. If the displacement is more or equal 0.02 Å, it is denoted as "S"; if the displacement is 0.005–0.01 Å, it is denoted as "W"; if the displacement is <0.005 Å, the ion is omitted from consideration.
